# Supplementary material
Source: publisher figshare collection journal article supplement (https://asha.figshare.com/articles/dataset/_/19709146)
Supplement: Supplementary file 2 [file 1]

Child’s Name \_\_\_\_\_ Clinician’s Name \_\_\_\_\_ Date of Evaluation \_\_\_\_\_

**ProCAD (Profile of Childhood Apraxia of speech and Dysarthria) Auditory-Perceptual Feature Rating Checklist**

| Speech Subsystem                | Speech Feature                                                        |                                | Dysarthria/<br>CAS/<br>Both    | Speech Task 1                                                                                                             | Speech Task 2                                                                                                             | Speech Task 3                                                                                                             |
|---------------------------------|-----------------------------------------------------------------------|--------------------------------|--------------------------------|---------------------------------------------------------------------------------------------------------------------------|---------------------------------------------------------------------------------------------------------------------------|---------------------------------------------------------------------------------------------------------------------------|
| Respiration/<br>Phonation (R/P) | Volume                                                                | Low volume or loudness decay   | Dysarthria <sup>*,***</sup>    |                                                                                                                           |                                                                                                                           |                                                                                                                           |
|                                 |                                                                       | Excessive loudness             | Dysarthria <sup>*,**,***</sup> |                                                                                                                           |                                                                                                                           |                                                                                                                           |
|                                 |                                                                       | Excess loudness variation      | Dysarthria <sup>*,***</sup>    |                                                                                                                           |                                                                                                                           |                                                                                                                           |
|                                 | Speech breathing                                                      | Effortful/ Audible inspiration | Dysarthria <sup>*,***</sup>    |                                                                                                                           |                                                                                                                           |                                                                                                                           |
|                                 |                                                                       | Short breath groups            | Dysarthria <sup>*,***</sup>    |                                                                                                                           |                                                                                                                           |                                                                                                                           |
|                                 | Atypical voice quality                                                |                                | Dysarthria <sup>*,**,***</sup> |                                                                                                                           |                                                                                                                           |                                                                                                                           |
| Resonance (Res)                 | Fluctuating resonance/intermittent hyper/hyponasality                 |                                | Both <sup>*,***,†</sup>        |                                                                                                                           |                                                                                                                           |                                                                                                                           |
|                                 | Consistent hypernasality (with or without nasal emission)             |                                | Dysarthria <sup>*,**,***</sup> |                                                                                                                           |                                                                                                                           |                                                                                                                           |
| Rate/<br>Prosody (Pros)         | Slow rate                                                             |                                | Both <sup>*,**,***,†,††</sup>  |                                                                                                                           |                                                                                                                           |                                                                                                                           |
|                                 | Atypical stress/reduced stress                                        |                                | Both <sup>*,**,***,†,††</sup>  |                                                                                                                           |                                                                                                                           |                                                                                                                           |
|                                 | Lexical stress errors                                                 |                                | CAS <sup>†,††</sup>            |                                                                                                                           |                                                                                                                           |                                                                                                                           |
|                                 | Syllable segregation                                                  |                                | CAS <sup>†,††</sup>            |                                                                                                                           |                                                                                                                           |                                                                                                                           |
| Articulation (Artic)            | Imprecise articulatory contacts                                       |                                | Dysarthria <sup>*</sup>        |                                                                                                                           |                                                                                                                           |                                                                                                                           |
|                                 | Consonant distortions                                                 |                                | Both <sup>**,***,†,††</sup>    |                                                                                                                           |                                                                                                                           |                                                                                                                           |
|                                 | Vowel errors                                                          |                                | Both <sup>*,**,***,†,††</sup>  |                                                                                                                           |                                                                                                                           |                                                                                                                           |
|                                 | Voicing errors                                                        |                                | Both <sup>*,**,†,††</sup>      |                                                                                                                           |                                                                                                                           |                                                                                                                           |
|                                 | Intrusive schwa                                                       |                                | CAS <sup>†,††</sup>            |                                                                                                                           |                                                                                                                           |                                                                                                                           |
|                                 | Groping (articulatory searching)                                      |                                | CAS <sup>†,††</sup>            |                                                                                                                           |                                                                                                                           |                                                                                                                           |
|                                 | Increased difficulty with multisyll. words                            |                                | CAS <sup>†,††</sup>            |                                                                                                                           |                                                                                                                           |                                                                                                                           |
|                                 | Difficulty with initial artic configs/ transitional movement gestures |                                | CAS <sup>†,††</sup>            |                                                                                                                           |                                                                                                                           |                                                                                                                           |
| # Dys-only features             |                                                                       |                                |                                |                                                                                                                           |                                                                                                                           |                                                                                                                           |
| # CAS-only features             |                                                                       |                                |                                |                                                                                                                           |                                                                                                                           |                                                                                                                           |
| # Total features                |                                                                       |                                |                                |                                                                                                                           |                                                                                                                           |                                                                                                                           |
| Subsystems involved             |                                                                       |                                |                                | <input type="checkbox"/> R/P <input type="checkbox"/> Res<br><input type="checkbox"/> Pros <input type="checkbox"/> Artic | <input type="checkbox"/> R/P <input type="checkbox"/> Res<br><input type="checkbox"/> Pros <input type="checkbox"/> Artic | <input type="checkbox"/> R/P <input type="checkbox"/> Res<br><input type="checkbox"/> Pros <input type="checkbox"/> Artic |
| Diagnosis                       |                                                                       |                                |                                |                                                                                                                           |                                                                                                                           |                                                                                                                           |
| Severity                        |                                                                       |                                |                                |                                                                                                                           |                                                                                                                           |                                                                                                                           |

\**Duffy* 2019, \*\**Workinger & Kent*, 1992, \*\*\* *Scholderle et al*, 2020

<sup>†</sup>*Iuzzini-Seigel, Hogan & Green*, 2017, <sup>††</sup>*Shriberg, Potter & Strand*, 2011

(*Iuzzini-Seigel, Allison, & Stoeckel*, 2022)

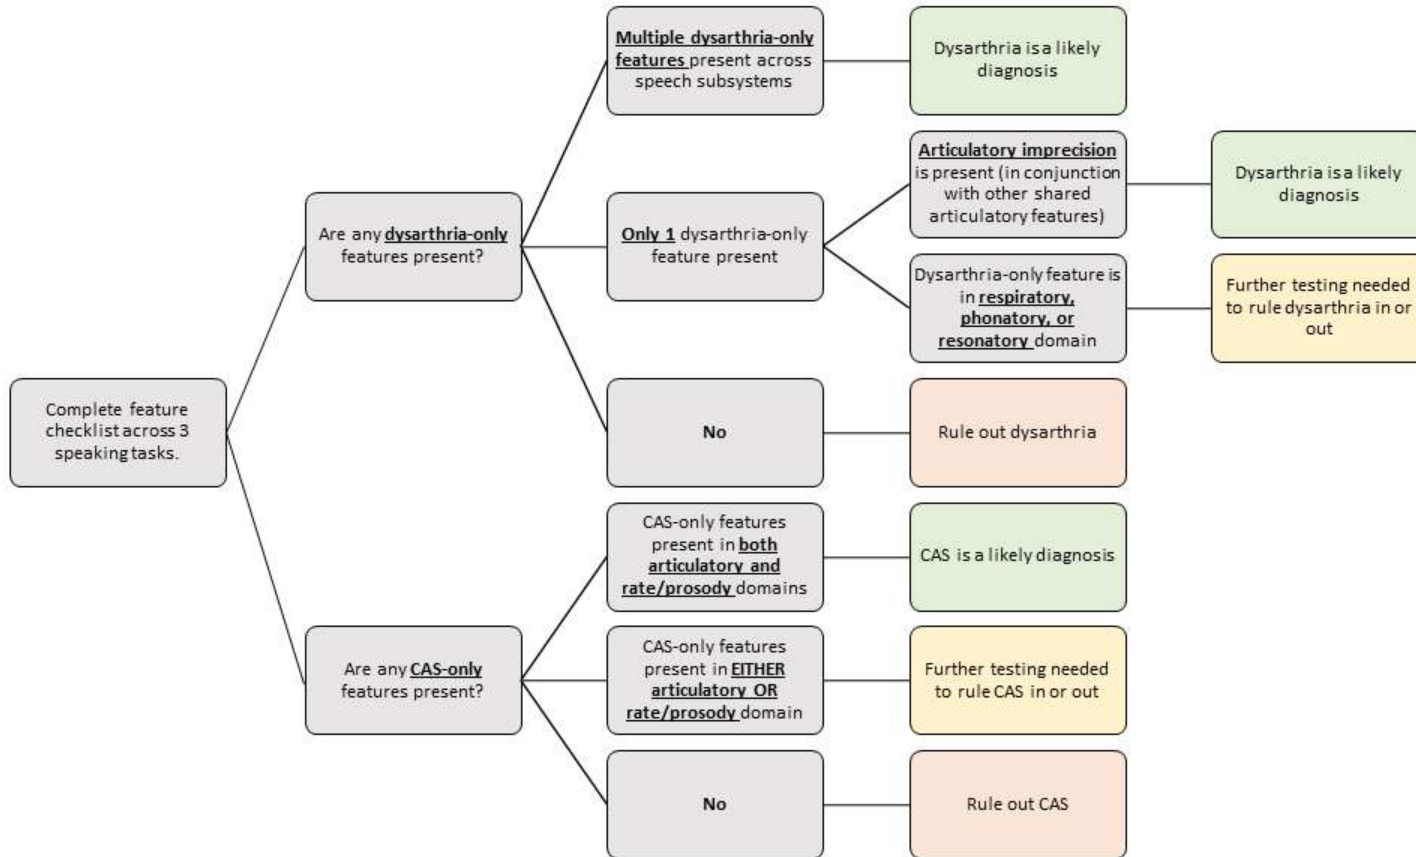

(Iuzzini-Seigel, Allison, & Stoeckel, 2022)
